# Supplementary material
Source: PubMed Central journal article supplement (PMC6441702)
Supplement: AnnalsATS.201806-424OC_miller_data_supplement.pdf [file AnnalsATS.201806-424OC_miller_data_supplement.pdf]

## **Increased Airway Wall Thickness in Interstitial Lung Abnormalities and Idiopathic Pulmonary Fibrosis**

Ezra R. Miller MD<sup>1</sup>, Rachel K. Putman MD MPH<sup>1</sup>, Alejandro A. Diaz MD<sup>1</sup>, Hanfei Xu MS<sup>2</sup>, Raúl San José Estépar PhD<sup>3</sup>, Tetsuro Araki MD PhD<sup>3,4</sup>, Mizuki Nishino MD MPH<sup>4</sup>, Sergio Poli de Frías MD<sup>1</sup>, Tomoyuki Hida MD<sup>4</sup>, James Ross PhD<sup>5</sup>, Harvey Coxson, PhD<sup>6</sup> Josée Dupuis PhD<sup>2</sup>, George T. O'Connor MD<sup>7</sup>, Edwin K. Silverman MD PhD<sup>1,8</sup>, Ivan O. Rosas MD<sup>1</sup>, Hiroto Hatabu MD PhD<sup>3,4</sup>, George Washko MD<sup>1</sup>, and Gary M. Hunninghake MD MPH<sup>1,4</sup>; for the Evaluation of COPD Longitudinally to Identify Predictive Surrogate Endpoints (ECLIPSE) and COPDGen investigators.

### **Data Supplement**

**Table E1.** Association of Pi10 levels and effect modification by interstitial lung abnormality subtypes

| Cohort                 | ILA Group                       | Subtype                | N           | Mean Pi10, mm (SD) | P-value* | P-value for the difference between groups† |
|------------------------|---------------------------------|------------------------|-------------|--------------------|----------|--------------------------------------------|
| COPDGene               |                                 | No ILA                 | 5375        | 3.66 (0.13)        | -        | -                                          |
|                        | IPF HRCT imaging patterns‡      | Inconsistent with UIP§ | 5783        | 3.74 (0.14)        | <0.001   | <0.001                                     |
|                        |                                 | Indeterminate for UIP§ | 5563        | 3.71 (0.14)        | <0.001   |                                            |
|                        |                                 | Probable UIP§          | 5464        | 3.67 (0.11)        | 0.64     |                                            |
|                        |                                 | UIP§                   | 5390        | 3.72 (0.20)        | 0.07     |                                            |
|                        | Presence or absence of fibrosis | Fibrosis               | 5505        | 3.70 (0.14)        | 0.009    | 0.07                                       |
| No fibrosis            |                                 | 5944                   | 3.72 (0.14) | <0.001             |          |                                            |
| ECLIPSE                |                                 | No ILA                 | 473         | 3.94 (0.20)        | -        | -                                          |
|                        | Presence or absence of fibrosis | Fibrosis               | 498         | 4.00 (0.17)        | 0.20     | 0.83                                       |
|                        |                                 | No Fibrosis            | 590         | 3.99 (0.22)        | 0.04     |                                            |
| Framingham Heart Study |                                 | No ILA                 | 1062        | 3.64 (0.22)        | -        | -                                          |
|                        | IPF HRCT imaging patterns‡      | Inconsistent with UIP§ | 1087        | 3.72 (0.20)        | 0.14     | 0.89                                       |
|                        |                                 | Indeterminate for UIP§ | 1120        | 3.71 (0.26)        | 0.04     |                                            |
|                        |                                 | Probable UIP§          | 1082        | 3.74 (0.31)        | 0.04     |                                            |
|                        |                                 | UIP§                   | 1064        | 3.73 (0.29)        | 0.79     |                                            |
|                        | Presence or absence of fibrosis | Fibrosis               | 1088        | 3.75 (0.29)        | 0.02     | 0.35                                       |
| No fibrosis            |                                 | 1141                   | 3.71 (0.25) | -                  |          |                                            |

\* P-values are for the comparison between those with and without ILA were ILA is limited to those with a particular subgroup.

† P-values represent a comparison between Pi10 and particular ILA subgroups limited to those with ILA. The p values for the IPF HRCT (Idiopathic pulmonary fibrosis high-resolution chest computed tomography) imaging patterns, and for those with and without fibrosis represent an ANOVA between groups.

‡ IPF HRCT (Idiopathic pulmonary fibrosis high-resolution chest computed tomography) imaging patterns: Represents the 2018 recommendations by the ATS/ERS/JRS/ALAT on the utilization of HRCT imaging to identify four IPF diagnostic categories.(1)

§ UIP: usual interstitial pneumonia.

||The presence or absence of fibrosis: Includes those with ILA with and without interstitial lung abnormalities limited to those with pulmonary parenchymal architectural distortion highly suggestive of a fibrotic lung disease.(2)

**Supplemental table E2a:** Association of interstitial lung abnormalities and individual airway characteristics in COPDGene.

| <b>Model*</b>                                                | <b>Airway</b>               | <b>ILA Effect Measure (95%CI)</b> | <b>P-value</b> |
|--------------------------------------------------------------|-----------------------------|-----------------------------------|----------------|
| Change in wall area (mm <sup>2</sup> )                       | Right Main Bronchus         | 0.98 (-0.39, 2.35)                | 0.16           |
| Adjusted change in wall area (mm <sup>2</sup> ) <sup>†</sup> | Right Main Bronchus         | 2.25 (1.10, 3.39)                 | <0.001         |
| Change in lumen area (mm <sup>2</sup> )                      | Right Main Bronchus         | -0.01 (-1.85, 1.82)               | 0.99           |
| Adjusted change in lumen area (mm <sup>2</sup> )             | Right Main Bronchus         | 2.23 (0.75, 3.71)                 | 0.003          |
| Change in wall area percent <sup>‡</sup> (%)                 | Right Main Bronchus         | 0.17 (0.05, 0.29)                 | 0.006          |
| Adjusted change in wall area percent <sup>‡</sup> (%)        | Right Main Bronchus         | 0.11 (-0.01, 0.23)                | 0.08           |
| Change in wall area (mm <sup>2</sup> )                       | RUL Bronchus                | -0.01 (-0.98, 0.95)               | 0.98           |
| Adjusted change in wall area (mm <sup>2</sup> )              | RUL Bronchus                | 0.62 (-0.30, 1.55)                | 0.19           |
| Change in lumen area (mm <sup>2</sup> )                      | RUL Bronchus                | -0.53 (-2.16, 1.09)               | 0.52           |
| Adjusted change in lumen area (mm <sup>2</sup> )             | RUL Bronchus                | 0.57 (-1.04, 2.18)                | 0.49           |
| Change in wall area percent (%)                              | RUL Bronchus                | 0.14 (-0.05, 0.32)                | 0.15           |
| Adjusted change in wall area percent (%)                     | RUL Bronchus                | -0.01 (-0.19, 0.17)               | 0.90           |
| Change in wall area (mm <sup>2</sup> )                       | RUL Apical Segment          | 0.42 (0.03, 0.8)                  | 0.03           |
| Adjusted change in wall area (mm <sup>2</sup> )              | RUL Apical Segment          | 0.68 (0.31, 1.04)                 | 0.0003         |
| Change in lumen area (mm <sup>2</sup> )                      | RUL Apical Segment          | 0.22 (-0.21, 0.66)                | 0.32           |
| Adjusted change in lumen area (mm <sup>2</sup> )             | RUL Apical Segment          | 0.62 (0.19, 1.04)                 | 0.005          |
| Change in wall area percent (%)                              | RUL Apical Segment          | 0.19 (0.02, 0.36)                 | 0.03           |
| Adjusted change in wall area percent (%)                     | RUL Apical Segment          | -0.03 (-0.19, 0.13)               | 0.73           |
| Change in wall area (mm <sup>2</sup> )                       | Right Intermediate Bronchus | 0.61 (-0.06, 1.28)                | 0.08           |
| Adjusted change in wall area (mm <sup>2</sup> )              | Right Intermediate Bronchus | 1.09 (0.58, 1.60)                 | <0.001         |
| Change in lumen area (mm <sup>2</sup> )                      | Right Intermediate Bronchus | 0.65 (-0.40, 1.69)                | 0.23           |
| Adjusted change in lumen area (mm <sup>2</sup> )             | Right Intermediate Bronchus | 1.54 (0.73, 2.34)                 | <0.001         |
| Change in wall area percent (%)                              | Right Intermediate Bronchus | 0.05 (-0.8, 0.17)                 | 0.45           |
| Adjusted change in wall area percent (%)                     | Right Intermediate Bronchus | -0.2 (-0.14, 0.10)                | 0.73           |
| Change in wall area (mm <sup>2</sup> )                       | RML Lateral Segment         | 0.57 (0.27, 0.86)                 | <0.001         |
| Adjusted change in wall area (mm <sup>2</sup> )              | RML Lateral Segment         | 0.71 (0.44, 0.99)                 | <0.001         |
| Change in lumen area (mm <sup>2</sup> )                      | RML Lateral Segment         | 0.19 (-0.07, 0.46)                | 0.15           |

|                                                  |                             |                      |        |
|--------------------------------------------------|-----------------------------|----------------------|--------|
| Adjusted change in lumen area (mm <sup>2</sup> ) | RML Lateral Segment         | 0.38 (0.13, 0.63)    | 0.003  |
| Change in wall area percent (%)                  | RML Lateral Segment         |                      |        |
| Adjusted change in wall area percent (%)         | RML Lateral Segment         | 0.07 (-0.06, 0.02)   | 0.3    |
| Change in wall area (mm <sup>2</sup> )           | RLL Bronchus                | -0.002 (-0.41, 0.41) | 0.99   |
| Adjusted change in wall area (mm <sup>2</sup> )  | RLL Bronchus                | 0.41 (0.05, 0.77)    | 0.03   |
| Change in lumen area (mm <sup>2</sup> )          | RLL Bronchus                | -0.30 (-0.88, 0.28)  | 0.31   |
| Adjusted change in lumen area (mm <sup>2</sup> ) | RLL Bronchus                | 0.3 (-0.25, 0.85)    | 0.28   |
| Change in wall area percent (%)                  | RLL Bronchus                | 0.15 (-0.04, 0.33)   | 0.11   |
| Adjusted change in wall area percent (%)         | RLL Bronchus                | -0.02 (-0.19, 0.15)  | 0.82   |
| Change in wall area (mm <sup>2</sup> )           | RLL Posterior Basal Segment | 0.49 (0.16, 0.81)    | 0.004  |
| Adjusted change in wall area (mm <sup>2</sup> )  | RLL Posterior Basal Segment | 0.68 (0.37, 0.98)    | <0.001 |
| Change in lumen area (mm <sup>2</sup> )          | RLL Posterior Basal Segment | 0.14 (-0.25, 0.53)   | 0.49   |
| Adjusted change in lumen area (mm <sup>2</sup> ) | RLL Posterior Basal Segment | 0.47 (0.09, 0.84)    | 0.02   |
| Change in wall area percent (%)                  | RLL Posterior Basal Segment | 0.20 (0.04, 0.36)    | 0.02   |
| Adjusted change in wall area percent (%)         | RLL Posterior Basal Segment | 0.0003 (-0.15, 0.15) | 0.99   |
| Change in wall area (mm <sup>2</sup> )           | Left Main Bronchus          | 0.46 (-0.43, 1.36)   | 0.31   |
| Adjusted change in wall area (mm <sup>2</sup> )  | Left Main Bronchus          | 1.42 (0.68, 2.16)    | <0.001 |
| Change in lumen area (mm <sup>2</sup> )          | Left Main Bronchus          | 0.12 (-1.20, 1.44)   | 0.86   |
| Adjusted change in lumen area (mm <sup>2</sup> ) | Left Main Bronchus          | 1.85 (0.84, 2.86)    | <0.001 |
| Change in wall area percent (%)                  | Left Main Bronchus          | 0.11 (-0.02, 0.25)   | 0.11   |
| Adjusted change in wall area percent (%)         | Left Main Bronchus          | 0.007 (-0.12, 0.14)  | 0.91   |
| Change in wall area (mm <sup>2</sup> )           | LUL Bronchus                | -0.79 (-1.61, 0.02)  | 0.06   |
| Adjusted change in wall area (mm <sup>2</sup> )  | LUL Bronchus                | 0.26 (-0.50, 1.02)   | 0.50   |
| Change in lumen area (mm <sup>2</sup> )          | LUL Bronchus                | -1.37 (-2.62, -0.13) | 0.03   |
| Adjusted change in lumen area (mm <sup>2</sup> ) | LUL Bronchus                | 0.23 (-0.95, 1.42)   | 0.70   |
| Change in wall area percent (%)                  | LUL Bronchus                | 0.23 (0.05, 0.41)    | 0.01   |
| Adjusted change in wall area percent (%)         | LUL Bronchus                | 0.07 (-0.10, 0.24)   | 0.41   |
| Change in wall area (mm <sup>2</sup> )           | LUL Apicoposterior Segment  | 0.32 (0.01, 0.63)    | 0.04   |
| Adjusted change in wall area (mm <sup>2</sup> )  | LUL Apicoposterior Segment  | 0.57 (0.28, 0.86)    | <0.001 |
| Change in lumen area (mm <sup>2</sup> )          | LUL Apicoposterior Segment  | 0.10 (-0.15, 0.35)   | 0.42   |

|                                                  |                               |                      |        |
|--------------------------------------------------|-------------------------------|----------------------|--------|
| Adjusted change in lumen area (mm <sup>2</sup> ) | LUL Apicoposterior Segment    | 0.40 (0.17, 0.64)    | <0.001 |
| Change in wall area percent (%)                  | LUL Apicoposterior Segment    | 0.15 (0.008, 0.30)   | 0.04   |
| Adjusted change in wall area percent (%)         | LUL Apicoposterior Segment    | -0.05 (-0.18, 0.08)  | 0.47   |
| Change in wall area (mm <sup>2</sup> )           | LUL Superior Lingular Segment | 0.42 (0.11, 0.73)    | 0.009  |
| Adjusted change in wall area (mm <sup>2</sup> )  | LUL Superior Lingular Segment | 0.58 (0.28, 0.88)    | <0.001 |
| Change in lumen area (mm <sup>2</sup> )          | LUL Superior Lingular Segment | 0.08 (-0.19, 0.34)   | 0.57   |
| Adjusted change in lumen area (mm <sup>2</sup> ) | LUL Superior Lingular Segment | 0.33 (0.07, 0.58)    | 0.01   |
| Change in wall area percent (%)                  | LUL Superior Lingular Segment | 0.20 (0.05, 0.34)    | 0.008  |
| Adjusted change in wall area percent (%)         | LUL Superior Lingular Segment | 0.006 (-0.13, 0.14)  | 0.93   |
| Change in wall area (mm <sup>2</sup> )           | LLL Bronchus                  | 0.11 (-0.32, 0.54)   | 0.62   |
| Adjusted change in wall area (mm <sup>2</sup> )  | LLL Bronchus                  | 0.73 (0.36, 1.10)    | <0.001 |
| Change in lumen area (mm <sup>2</sup> )          | LLL Bronchus                  | -0.39 (-1.01, 0.22)  | 0.21   |
| Adjusted change in lumen area (mm <sup>2</sup> ) | LLL Bronchus                  | 0.69 (0.12, 1.25)    | 0.02   |
| Change in wall area percent (%)                  | LLL Bronchus                  | 0.25 (0.07, 0.43)    | 0.007  |
| Adjusted change in wall area percent (%)         | LLL Bronchus                  | -0.009 (-0.18, 0.16) | 0.92   |
| Change in wall area (mm <sup>2</sup> )           | LLL Posterior Basal Segment   | 0.41 (0.07, 0.75)    | 0.02   |
| Adjusted change in wall area (mm <sup>2</sup> )  | LLL Posterior Basal Segment   | 0.70 (0.39, 1.01)    | <0.001 |
| Change in lumen area (mm <sup>2</sup> )          | LLL Posterior Basal Segment   | 0.10 (-0.29, 0.50)   | 0.61   |
| Adjusted change in lumen area (mm <sup>2</sup> ) | LLL Posterior Basal Segment   | 0.57 (0.20, 0.95)    | 0.003  |
| Change in wall area percent (%)                  | LLL Posterior Basal Segment   | 0.12 (-0.05, 0.29)   | 0.15   |
| Adjusted change in wall area percent (%)         | LLL Posterior Basal Segment   | -0.11 (-0.27, 0.04)  | 0.16   |

ILA are interstitial lung abnormalities: RUL is right upper lobe; RML is right middle lobe; RLL is right lower lobe; LUL is left upper lobe; LLL is left lower lobe.

\* Models are univariable/multivariable models assessing the effect of ILA (present vs. not present) on changes in individual airway wall area in mm<sup>2</sup>, airway lumen area in mm<sup>2</sup>, and wall area percent.

†All adjusted models adjusted for: Age, Gender, Race, BMI, Pack Years Smoked, Smoking Status, Gold Stage, and Total Lung Capacity Percent Predicted

‡Wall area percent refers to the ratio of wall area to total bronchial area.

**Supplemental table E2b:** Association of interstitial lung abnormalities and individual airway characteristics in Framingham Heart Study.

| Model*                                                       | Airway           | ILA Effect Measure (95%CI) | P-value |
|--------------------------------------------------------------|------------------|----------------------------|---------|
| Change in wall area (mm <sup>2</sup> )                       | RUL Generation 3 | 0.585 (-0.328, 1.500)      | 0.21    |
| Adjusted change in wall area (mm <sup>2</sup> ) <sup>†</sup> | RUL Generation 3 | 0.713 (-0.257, 1.683)      | 0.15    |
| Change in lumen area (mm <sup>2</sup> )                      | RUL Generation 3 | 0.843 (-0.632, 2.318)      | 0.26    |
| Adjusted change in lumen area (mm <sup>2</sup> )             | RUL Generation 3 | 0.851 (-0.703, 2.405)      | 0.28    |
| Change in wall area percent <sup>‡</sup> (%)                 | RUL Generation 3 | -0.321 (-1.436, 0.795)     | 0.57    |
| Adjusted change in wall area percent (%)                     | RUL Generation 3 | -0.466 (-1.622, 0.690)     | 0.43    |
| Change in wall area (mm <sup>2</sup> )                       | RUL Generation 4 | 1.273 (0.651, 1.895)       | <0.001  |
| Adjusted change in wall area (mm <sup>2</sup> )              | RUL Generation 4 | 1.194 (0.535, 1.852)       | <0.001  |
| Change in lumen area (mm <sup>2</sup> )                      | RUL Generation 4 | 1.580 (0.647, 2.514)       | <0.001  |
| Adjusted change in lumen area (mm <sup>2</sup> )             | RUL Generation 4 | 1.353 (0.368, 2.339)       | 0.007   |
| Change in wall area percent (%)                              | RUL Generation 4 | -1.250 (-2.509, 0.010)     | 0.052   |
| Adjusted change in wall area percent (%)                     | RUL Generation 4 | -1.016 (-2.338, 0.305)     | 0.13    |
| Change in wall area (mm <sup>2</sup> )                       | RLL Generation 3 | 0.701 (0.050, 1.351)       | 0.04    |
| Adjusted change in wall area (mm <sup>2</sup> )              | RLL Generation 3 | 0.673 (0.031, 1.315)       | 0.04    |
| Change in lumen area (mm <sup>2</sup> )                      | RLL Generation 3 | -0.408 (-1.650, 0.833)     | 0.52    |
| Adjusted change in lumen area (mm <sup>2</sup> )             | RLL Generation 3 | -0.081 (-1.332, 1.170)     | 0.90    |
| Change in wall area percent (%)                              | RLL Generation 3 | 1.457 (0.378, 2.537)       | 0.008   |
| Adjusted change in wall area percent (%)                     | RLL Generation 3 | 0.952 (-0.148, 2.052)      | 0.09    |
| Change in wall area (mm <sup>2</sup> )                       | RLL Generation 4 | 0.663 (0.010, 1.316)       | 0.047   |
| Adjusted change in wall area (mm <sup>2</sup> )              | RLL Generation 4 | 0.676 (0.003, 1.350)       | 0.049   |
| Change in lumen area (mm <sup>2</sup> )                      | RLL Generation 4 | 0.104 (-1.043, 1.252)      | 0.86    |
| Adjusted change in lumen area (mm <sup>2</sup> )             | RLL Generation 4 | 0.234 (-0.956, 1.423)      | 0.70    |
| Change in wall area percent (%)                              | RLL Generation 4 | 1.059 (-0.157, 2.275)      | 0.09    |
| Adjusted change in wall area percent (%)                     | RLL Generation 4 | 0.772 (-0.496, 2.040)      | 0.23    |

ILA are interstitial lung abnormalities; RUL is right upper lobe; RML is right middle lobe; RLL is right lower lobe; LUL is left upper lobe; LLL is left lower lobe.

\* Models are univariable/multivariable models assessing the effect of ILA (present vs. not present) on changes in individual airway wall area in mm<sup>2</sup>, airway lumen area in mm<sup>2</sup>, and wall area percent.

† All adjusted models adjusted for: Age, Gender, Race, BMI, Pack Years Smoked, Smoking Status, and Total Lung Capacity Percent Predicted.

‡ Wall area percent refers to the ratio of wall area to total bronchial area.



## References:

1. Raghu G, Remy-Jardin M, Myers JL, Richeldi L, Ryerson CJ, Lederer DJ, Behr J, Cottin V, Danoff SK, Morell F, Flaherty KR, Wells A, Martinez FJ, Azuma A, Bice TJ, Bouros D, Brown KK, Collard HR, Duggal A, Galvin L, Inoue Y, Jenkins RG, Johkoh T, Kazerooni EA, Kitaichi M, Knight SL, Mansour G, Nicholson AG, Pipavath SNJ, Buendia-Roldan I, Selman M, Travis WD, Walsh S, Wilson KC, American Thoracic Society ERSJRS, Latin American Thoracic S. Diagnosis of Idiopathic Pulmonary Fibrosis. An Official ATS/ERS/JRS/ALAT Clinical Practice Guideline. *Am J Respir Crit Care Med* 2018; 198: e44-e68.
2. Hunninghake GM, Hatabu H, Okajima Y, Gao W, Dupuis J, Latourelle JC, Nishino M, Araki T, Zazueta OE, Kurugol S, Ross JC, San Jose Estepar R, Murphy E, Steele MP, Loyd JE, Schwarz MI, Fingerlin TE, Rosas IO, Washko GR, O'Connor GT, Schwartz DA. MUC5B promoter polymorphism and interstitial lung abnormalities. *N Engl J Med* 2013; 368: 2192-2200.
